# Supplementary material for: SPAG17 Is Required for Male Germ Cell Differentiation and Fertility
Source: MDPI journal article supplement (doi:10.3390/ijms19041252), 2018-04-21

**A**

```

atggcacccaagaaggagaaaacctaccgggagcgcaaactataagatatgggaaccttcc
M A P K K E K P T G S A N Y K I W E P S
ctcatagctgcacacttgaaccagaatgattggaaggcctccatcgcttcgtgggtggg
L I A A H L N Q N D W K A S I A F V V G
aaccgagttgaggatgatcttctcattcatgcccttgacctgggtgttcgactccctcag
N R V E D D L L I H A L D L A V R L P Q
cggaaactcttcagtattgtgtcatgggaagacattctgcagcagatggatgaaatacag
R K L F S I V S W E D I L Q Q M D E I Q
tcacttgcgtgaaagtgccttcagctaaaaaggggaaaaagcccacatctgtcaatttaccg
S L A E S A S A K K G K K P T S V N L P
ttacattacgaggtgttccctggcagcaaaagataatcatggagagtggagagaaactaacc
L H Y E V F L A A K I I M E S G E K L T
ttaccattgatagggaactcttgaagtgtcaacttctccatattaaatccaaggaccag
L P L I G K L L K C Q L L H I K S K D Q
cagagacgagaaaatgaaaagaagggtcccagggtcccgaaaaccaaagaagaagaacccta
Q R R E N E K K V P G P E N Q R R R T L
acaaagaggacaagcggcctcgacagccttactgctgagcagctccagagggtcaagg
T K R T S G L A Q P S L L S S S R G S R
ctgagtttcagaccaacagatgatgagccagacgatgggtgcccaatattacattattgtt
L S F R P T D D E P D D G A Q Y Y I I V
gtgggcttcaacaatcctcagctattggccattatgactgagcttggaccctactttttc
V G F N N P Q L L A I M T E L G P Y F F
tgttttgctccccctacttagccccctgcatgaaaatggataaattgccgctttttgatgat
C F A P L L S P L H E N G STOP I A A F D D
aactgatttatattgggattgaaccgtctgtgccaatggctcgttttagaccgtaatgc
N STOP F I L G L N R L C Q W L V L D P STOP C
ttgtcatccagcgttcttctctaca
L S S S V P S L

```

**B**

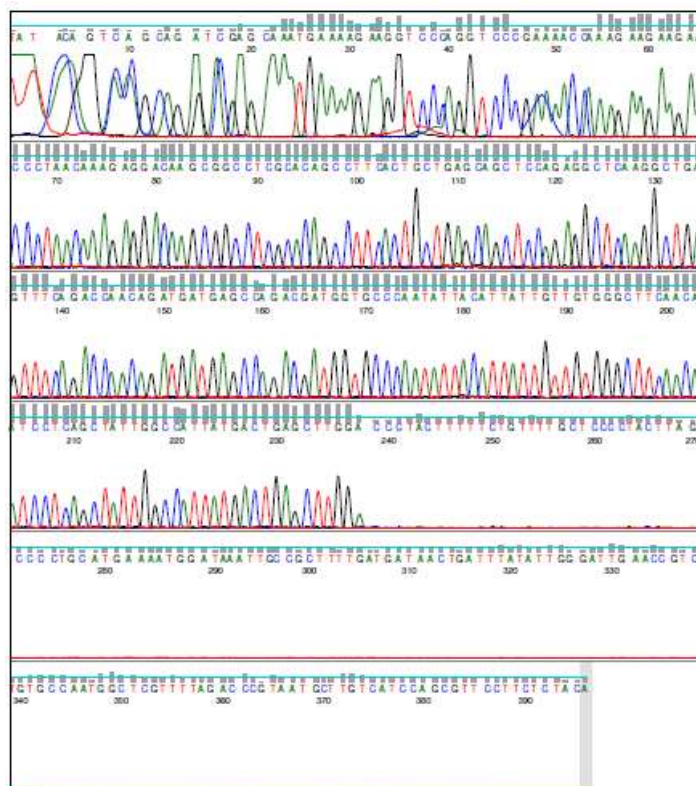

Supplement: s1 [file s1]
